# Supplementary material for: Synthesis and characterization of cyano-substituted pyridine derivatives for applications as exciton blockers in photovoltaic devices
Source: Royal Society of Chemistry journal article supplement (doi:10.1039/c2jm15287h), 2012-01-01
Supplement: c2jm15287h.pdf [file c2jm15287h.pdf]

## Supplementary information for

# Synthesis and Characterization of Cyano-substituted Pyridine Derivatives for Applications as Exciton Blocker in Photovoltaic Device

Juanjuan You, Ming-Fai Lo, Weimin Liu, Tsz-Wai Ng, Shiu-Lun Lai, Pengfei Wang,\* and Chun-Sing Lee\*

## Contents

1. **Figure S1.** Thermal properties measurements.
2. **Table S1.** Electron mobility measurements.
3. **Scheme S1.** Molecular structure of p-MPyCN's intermediate product.

### 1. Thermal properties measurements

TGA measurements were performed on a TA Instrument TGAQ50 with a heating rate of 10 °C min<sup>-1</sup> under a nitrogen atmosphere. *T<sub>g</sub>* and melting phase-transition temperature (*T<sub>m</sub>*) were determined by DSC performed on a TA Instrument DSC2910. The sample was firstly heated at a rate of 10 °C min<sup>-1</sup> to melt and then quenched, in which process *T<sub>m</sub>* was obtained. The quenched samples were heated for a second time at a rate of 10 °C min<sup>-1</sup>, and then *T<sub>g</sub>* was recorded.

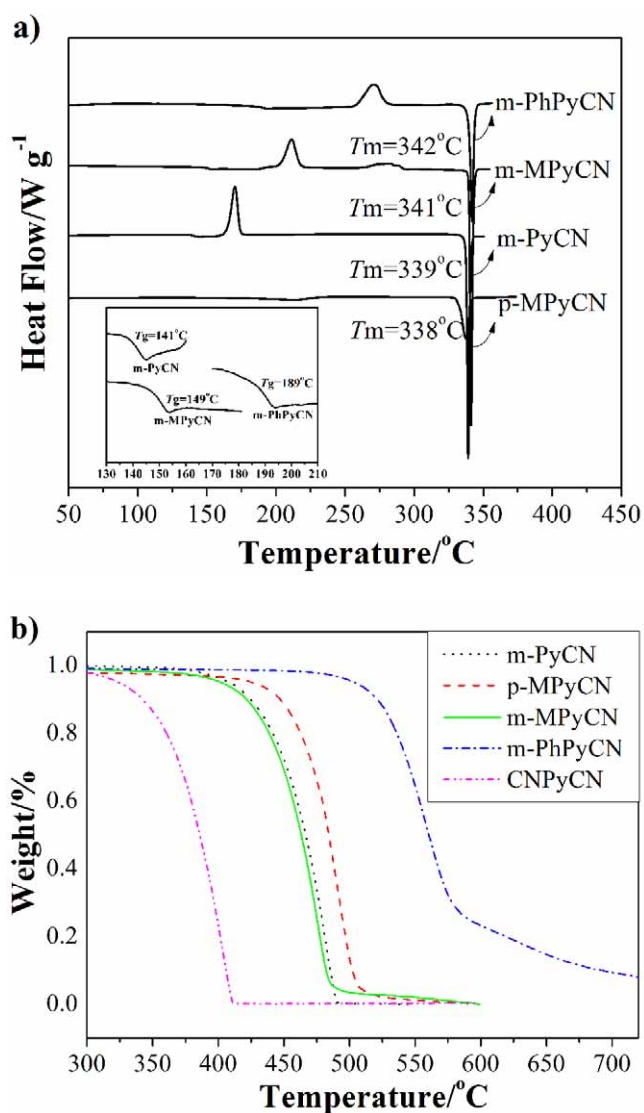

**Figure S1.** a): DSC data of the cyano-substituted pyridine derivatives. b): TGA data of the cyano-substituted pyridine derivatives.

## 2. Electron mobility measurements

To measure electron mobilities, bilayer electroluminescence (EL) devices with a configuration of ITO/NPB (60 nm)/Materials to be measured (60 nm)/Al (150 nm) were fabricated. Using a pulse generator as an electrical switch in a high-current driver circuit, voltage pulses of 3-12 V with a rise time less than 20 ns was obtained. The devices were driven by voltage pulses with duration of 2-25  $\mu$ s. EL from the device was detected by a silicon photo-diode attached to a high-speed receiver. The resulting transient photocurrent was analyzed with a storage oscilloscope (HP 54810A). For the interpretation of the luminance delay time, a voltage supply source was employed to give a trigger signal to start the collection of photocurrent. The transient responses of EL of all the devices were measured by averaging the data taken from 100 consecutive signals averaging.

**Table S1.** Electron mobilities of the cyano-substituted pyridine derivatives and referenced materials measured by transient electroluminescence (EL) method.

| Materials | Electron mobility<br>[cm <sup>2</sup> V <sup>-1</sup> s <sup>-1</sup> ] | Electric field<br>[V cm <sup>-1</sup> ]  | Reference         |
|-----------|-------------------------------------------------------------------------|------------------------------------------|-------------------|
| m-PhPyCN  | 4.8×10 <sup>-5</sup> ~ 5.6×10 <sup>-5</sup>                             | 5.0×10 <sup>5</sup> ~ 10×10 <sup>5</sup> | This work         |
| p-PPTNT   | 4.5×10 <sup>-5</sup> ~ 5.6×10 <sup>-5</sup>                             | 5.0×10 <sup>5</sup> ~ 10×10 <sup>5</sup> | This work         |
| m-MPyCN   | 5.6×10 <sup>-5</sup> ~ 6.1×10 <sup>-5</sup>                             | 5.0×10 <sup>5</sup> ~ 10×10 <sup>5</sup> | This work         |
| p-MPyCN   | 3.4×10 <sup>-5</sup> ~ 3.8×10 <sup>-5</sup>                             | 5.0×10 <sup>5</sup> ~ 10×10 <sup>5</sup> | This work         |
| m-PyCN    | 2.9×10 <sup>-5</sup> ~ 3.3×10 <sup>-5</sup>                             | 5.0×10 <sup>5</sup> ~ 10×10 <sup>5</sup> | This work         |
| CNPyCN    | n.a.                                                                    | n.a.                                     | This work         |
| BCP       | 6.0×10 <sup>-7</sup>                                                    | 7.0×10 <sup>5</sup>                      | Ref <sup>S1</sup> |

### 3. Molecular structure of p-MPyCN's intermediate product.

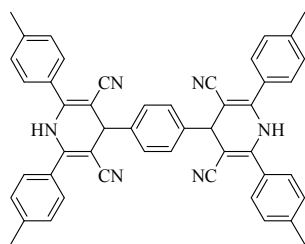

**Scheme S1.** Molecular structure of p-MPyCN's intermediate product.

<sup>1</sup>H NMR (400 MHz, DMSO-d<sub>6</sub>, δ): 10.11 (s, 2H), 7.56 (d, 12H, J = 8.0), 7.32 (d, 8H, J = 8.0), 4.72 (s, 2H), 2.37 (s, 12H).  
MS (EI, m/z): [M-4]<sup>+</sup> calcd. for C<sub>48</sub>H<sub>36</sub>N<sub>6</sub>: 696.3; found: 692.3.

S1 Z. Y. Xie, T. C. Wong, L. S. Hung, S. T. Lee, *Appl. Phys. Lett.*, 2002, **80**, 1477.
